# Supplementary material
Source: PubMed Central journal article supplement (PMC3293118)

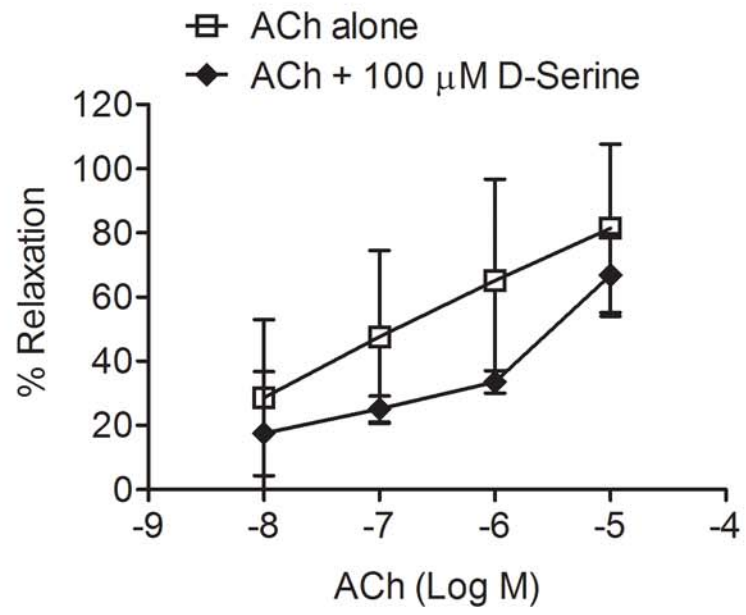

Supplementary Figure 1

**A**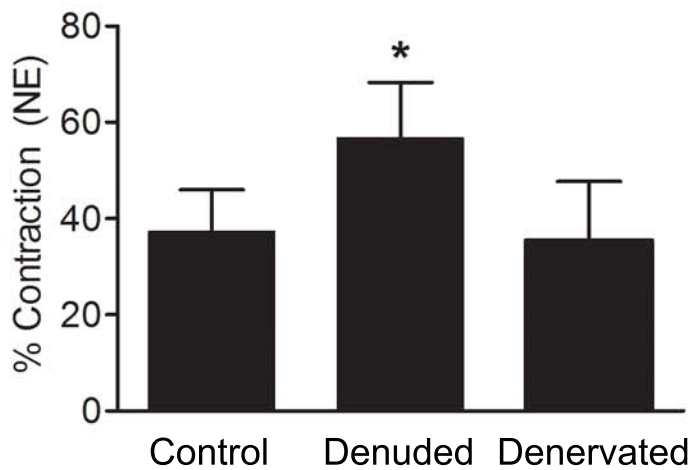**B**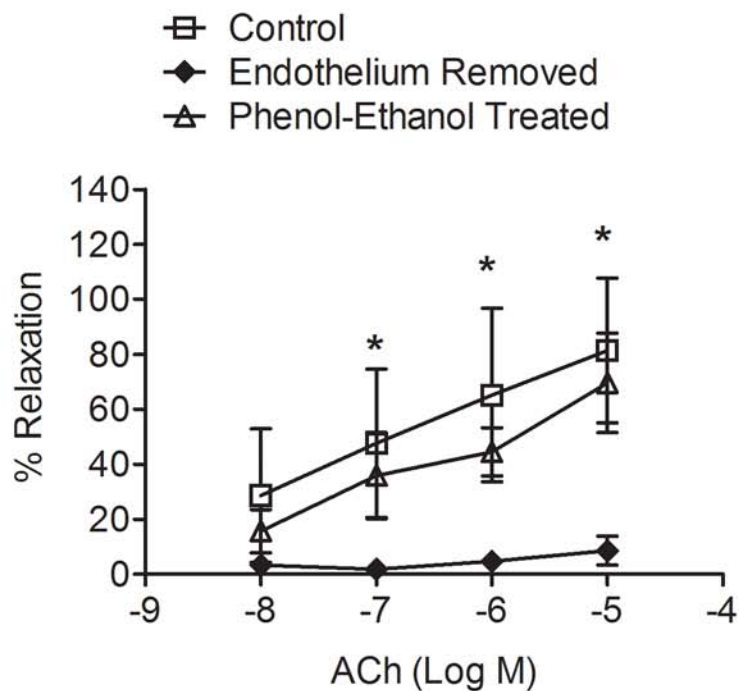**C**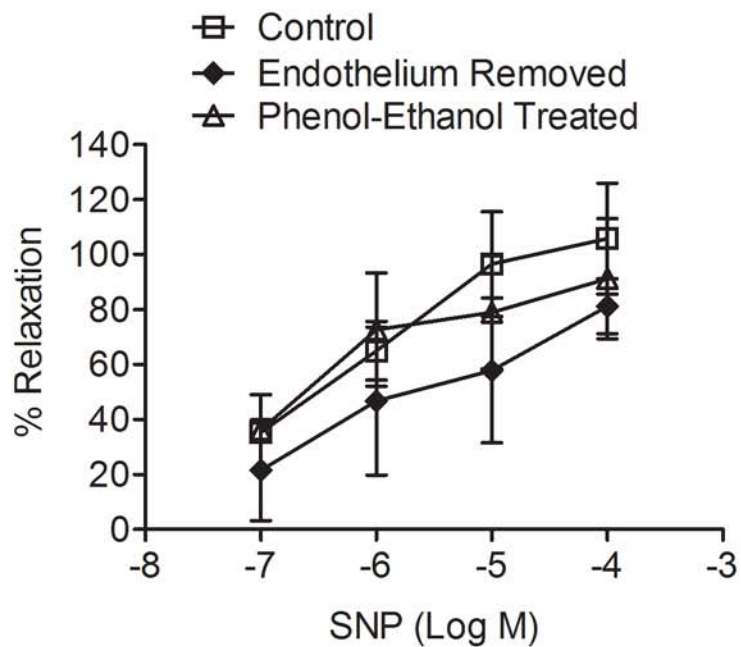

Supplement: jcbfm2011161x1.pdf [file jcbfm2011161x1.pdf]
